# Supplementary material
Source: PubMed Central journal article supplement (PMC7614574)
Supplement: EMS176149-supplement-Supplementary_Material.pdf [file EMS176149-supplement-Supplementary_Material.pdf]

Primer

 Check for updates

---

# Peptidomics

---

In the format provided by the  
authors and unedited

## Supplementary Information

### Peptidomics

Roland Hellinger<sup>1#</sup>, Arnar Sigurdsson<sup>2#</sup>, Wenxin Wu<sup>3#</sup>, Elena V. Romanova<sup>4#</sup>, Lingjun Li<sup>3\*</sup>, Jonathan V. Sweedler<sup>4\*</sup>, Roderich D. Süssmuth<sup>2\*</sup>, Christian W. Gruber<sup>1\*</sup>

<sup>1</sup>Center for Physiology and Pharmacology, Medical University of Vienna, 1090 Vienna, Austria

<sup>2</sup>Institut für Chemie, Technische Universität Berlin, Straße des 17. Juni 124, 10623 Berlin, Germany

<sup>3</sup>School of Pharmacy and Department of Chemistry, University of Wisconsin-Madison, 777 Highland Avenue, Madison, WI 53705-2222, USA

<sup>4</sup>Department of Chemistry, University of Illinois, 600 South Mathews Avenue, Urbana, IL 61801, USA

#these authors contributed equally

\*email: [christian.w.gruber@meduniwien.ac.at](mailto:christian.w.gruber@meduniwien.ac.at); [suessmuth@chem.tu-berlin.de](mailto:suessmuth@chem.tu-berlin.de); [lingjun.li@wisc.edu](mailto:lingjun.li@wisc.edu); [jsweedle@illinois.edu](mailto:jsweedle@illinois.edu)

**Supplementary Table 1: Full list of databases and tools.** Databases and tools marked with an asterisk are commercial platforms and maybe subject to licensing charges. DNA, deoxyribonucleic acid; RNA, ribonucleic acid; AA, amino acids; BGC, biosynthetic gene cluster

| <b>Databases:</b>                  |                            |                           |                                                                       |
|------------------------------------|----------------------------|---------------------------|-----------------------------------------------------------------------|
| <b>Database</b>                    | <b>Use case</b>            | <b>Data available</b>     | <b>Key features</b>                                                   |
| <a href="#">EMBL-EBI</a>           | Biological sequences       | DNA, RNA, AA              | Repository of biological sequence data for model organisms            |
| <a href="#">DDBJ</a>               | Biological sequences       | DNA, RNA, AA              | Repository of genomic sequence data                                   |
| <a href="#">MIBiG</a>              | Biological sequences       | BGCs                      | Repository containing biosynthetic gene clusters for natural products |
| <a href="#">VEuPathDB</a>          | Biological sequences       | DNA, RNA, AA              | Vector and host informatics resource                                  |
| <a href="#">AntiBase*</a>          | Physico-chemical data      | Spectra database          | Database of over 48,000 natural products and their structures         |
| <a href="#">Bactibase</a>          | Biological sequences       | AA                        | Dedicated repository for bacteriocins                                 |
| <a href="#">Conoserver</a>         | Biological sequences       | DNA, AA                   | Dedicated repository for conotoxins                                   |
| <a href="#">CyBase</a>             | Biological sequences       | DNA, AA                   | Dedicated repository for circular peptides                            |
| <b>Software:</b>                   |                            |                           |                                                                       |
| <b>Tool</b>                        | <b>Use case</b>            | <b>Input data</b>         | <b>Key Features</b>                                                   |
| <a href="#">EvoMining</a>          | RiPPs & NRPs               | DNA                       | Phylogenetic genome mining                                            |
| <a href="#">RODEO</a>              | RiPPs                      | Protein accession numbers | Gene neighborhood analysis on multiple RiPP clusters                  |
| <a href="#">BAGEL</a>              | RiPPs                      | DNA                       | Rule based detection of RiPPs                                         |
| <a href="#">SPADA</a>              | sORFs                      | DNA                       | Identification of small, one or two exon genes                        |
| <a href="#">miPepid</a>            | sORFs                      | DNA/RNA                   | Identification of sORFs from DNA/RNA sequences                        |
| <a href="#">DeepCPP</a>            | sORFs                      | RNA                       | Novel feature selection for sORFS with good coverage                  |
| <a href="#">rAMPAGE</a>            | Antimicrobial peptides     | RNA                       | Antimicrobial peptide detection in RNA-seq data                       |
| <b>Comparative genomics tools:</b> |                            |                           |                                                                       |
| <a href="#">CoGE</a>               | Identification of homologs | DNA                       | Suite of various tools for comparative genomics                       |
| <a href="#">EDGAR</a>              | Identification of homologs | DNA                       | Comparative genomics and phylogenomics                                |
| <b>Mapping to Genome tools:</b>    |                            |                           |                                                                       |

|                                    |                       |                                 |                                                                                                      |
|------------------------------------|-----------------------|---------------------------------|------------------------------------------------------------------------------------------------------|
| PoGo                               | PeptidoGenomic        | Peptide seq + PSM               | Fast mapping of peptides to genome coordinates                                                       |
| NERPA                              | NRPs                  | DNA + SMILES                    | Mapping of NRPs to biosynthetic gene clusters                                                        |
| BioCAT                             | NRPs                  | DNA + SMILES                    | Mapping of NRPs to biosynthetic gene clusters                                                        |
| <b>Peptidogenetic pipelines:</b>   |                       |                                 |                                                                                                      |
| MetaMiner                          | RiPPs                 | DNA+LC-MS/MS data               | Large scale screening for RiPP discovery (GNPS-framework)                                            |
| DeepRiPP                           | RiPPs                 | DNA (ORF)                       | Classification, processing and spectral matching                                                     |
| <b>Mass spectrometry analysis:</b> |                       |                                 |                                                                                                      |
| Dereplicator+                      | RiPPs & NRPs          | LC-MS/MS data                   | Natural product identification from MS spectra (GNPS-framework)                                      |
| VarQuest                           | RiPPs & NRPs          | LC-MS/MS data                   | Natural product identification from MS spectra (GNPS-framework)                                      |
| MZmine3                            | MS data analysis      | LC-MS/MS data                   | Visualisation and analysis of MS data                                                                |
| pacMass                            | Elemental composition | m/z, z, number of sulphur atoms | Prediction of elemental components for proteins and peptides                                         |
| MS-FINDER                          | MS data analysis      | EI-MS, GC-MS, MS/MS             | Formula predictions, fragment annotations and structure elucidation                                  |
| metaspace                          | MS data analysis      | LC-MS/MS data                   | Metabolite annotation from high-resolution spectra                                                   |
| cyclobranch 2                      | NRPs                  | LC-MS, MSI, MS/MS               | De-novo sequencing of NRPs from spectra                                                              |
| PEAKS Studio*                      | MS data analysis      | MS data                         | De novo and database searching, post-translational modification assignment, protein quantitation     |
| MaxQuant                           | Quantitative          | MS data                         | Quantitative proteomics tool                                                                         |
| TPP                                | MS data analysis      | LC-MS/MS data                   | Data processing pipeline for large-scale proteomics/peptidomics, qualitative and quantitative        |
| Skyline                            | MS data analysis      | LC-MS/MS data                   | Open source platform for qualitative and quantitative peptide analysis                               |
| Spectronaut*                       | MS data analysis      | LC-MS/MS data                   | Quantitative proteomics platform                                                                     |
| DIA-NN                             | MS data analysis      | LC-MS/MS data                   | DIA analysis using neural networks for signal selection, quantification, and interference correction |
| OpenSWATH                          | MS data analysis      | LC-MS/MS data                   | Analysis platform for DDA/DIA proteomics data                                                        |
| <b>MS-imaging tools:</b>           |                       |                                 |                                                                                                      |
| MassImager                         | MS data analysis      | MS-imaging                      | MS-imaging platform with automatic pattern recognition                                               |
